# Supplementary material
Source: publisher figshare collection journal article supplement (https://frontiersin.figshare.com/ndownloader/files/34640546)

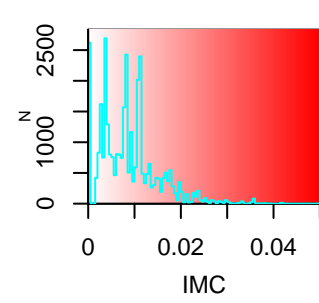

Heatmap Kolmogorov–Smirnov, statistic D

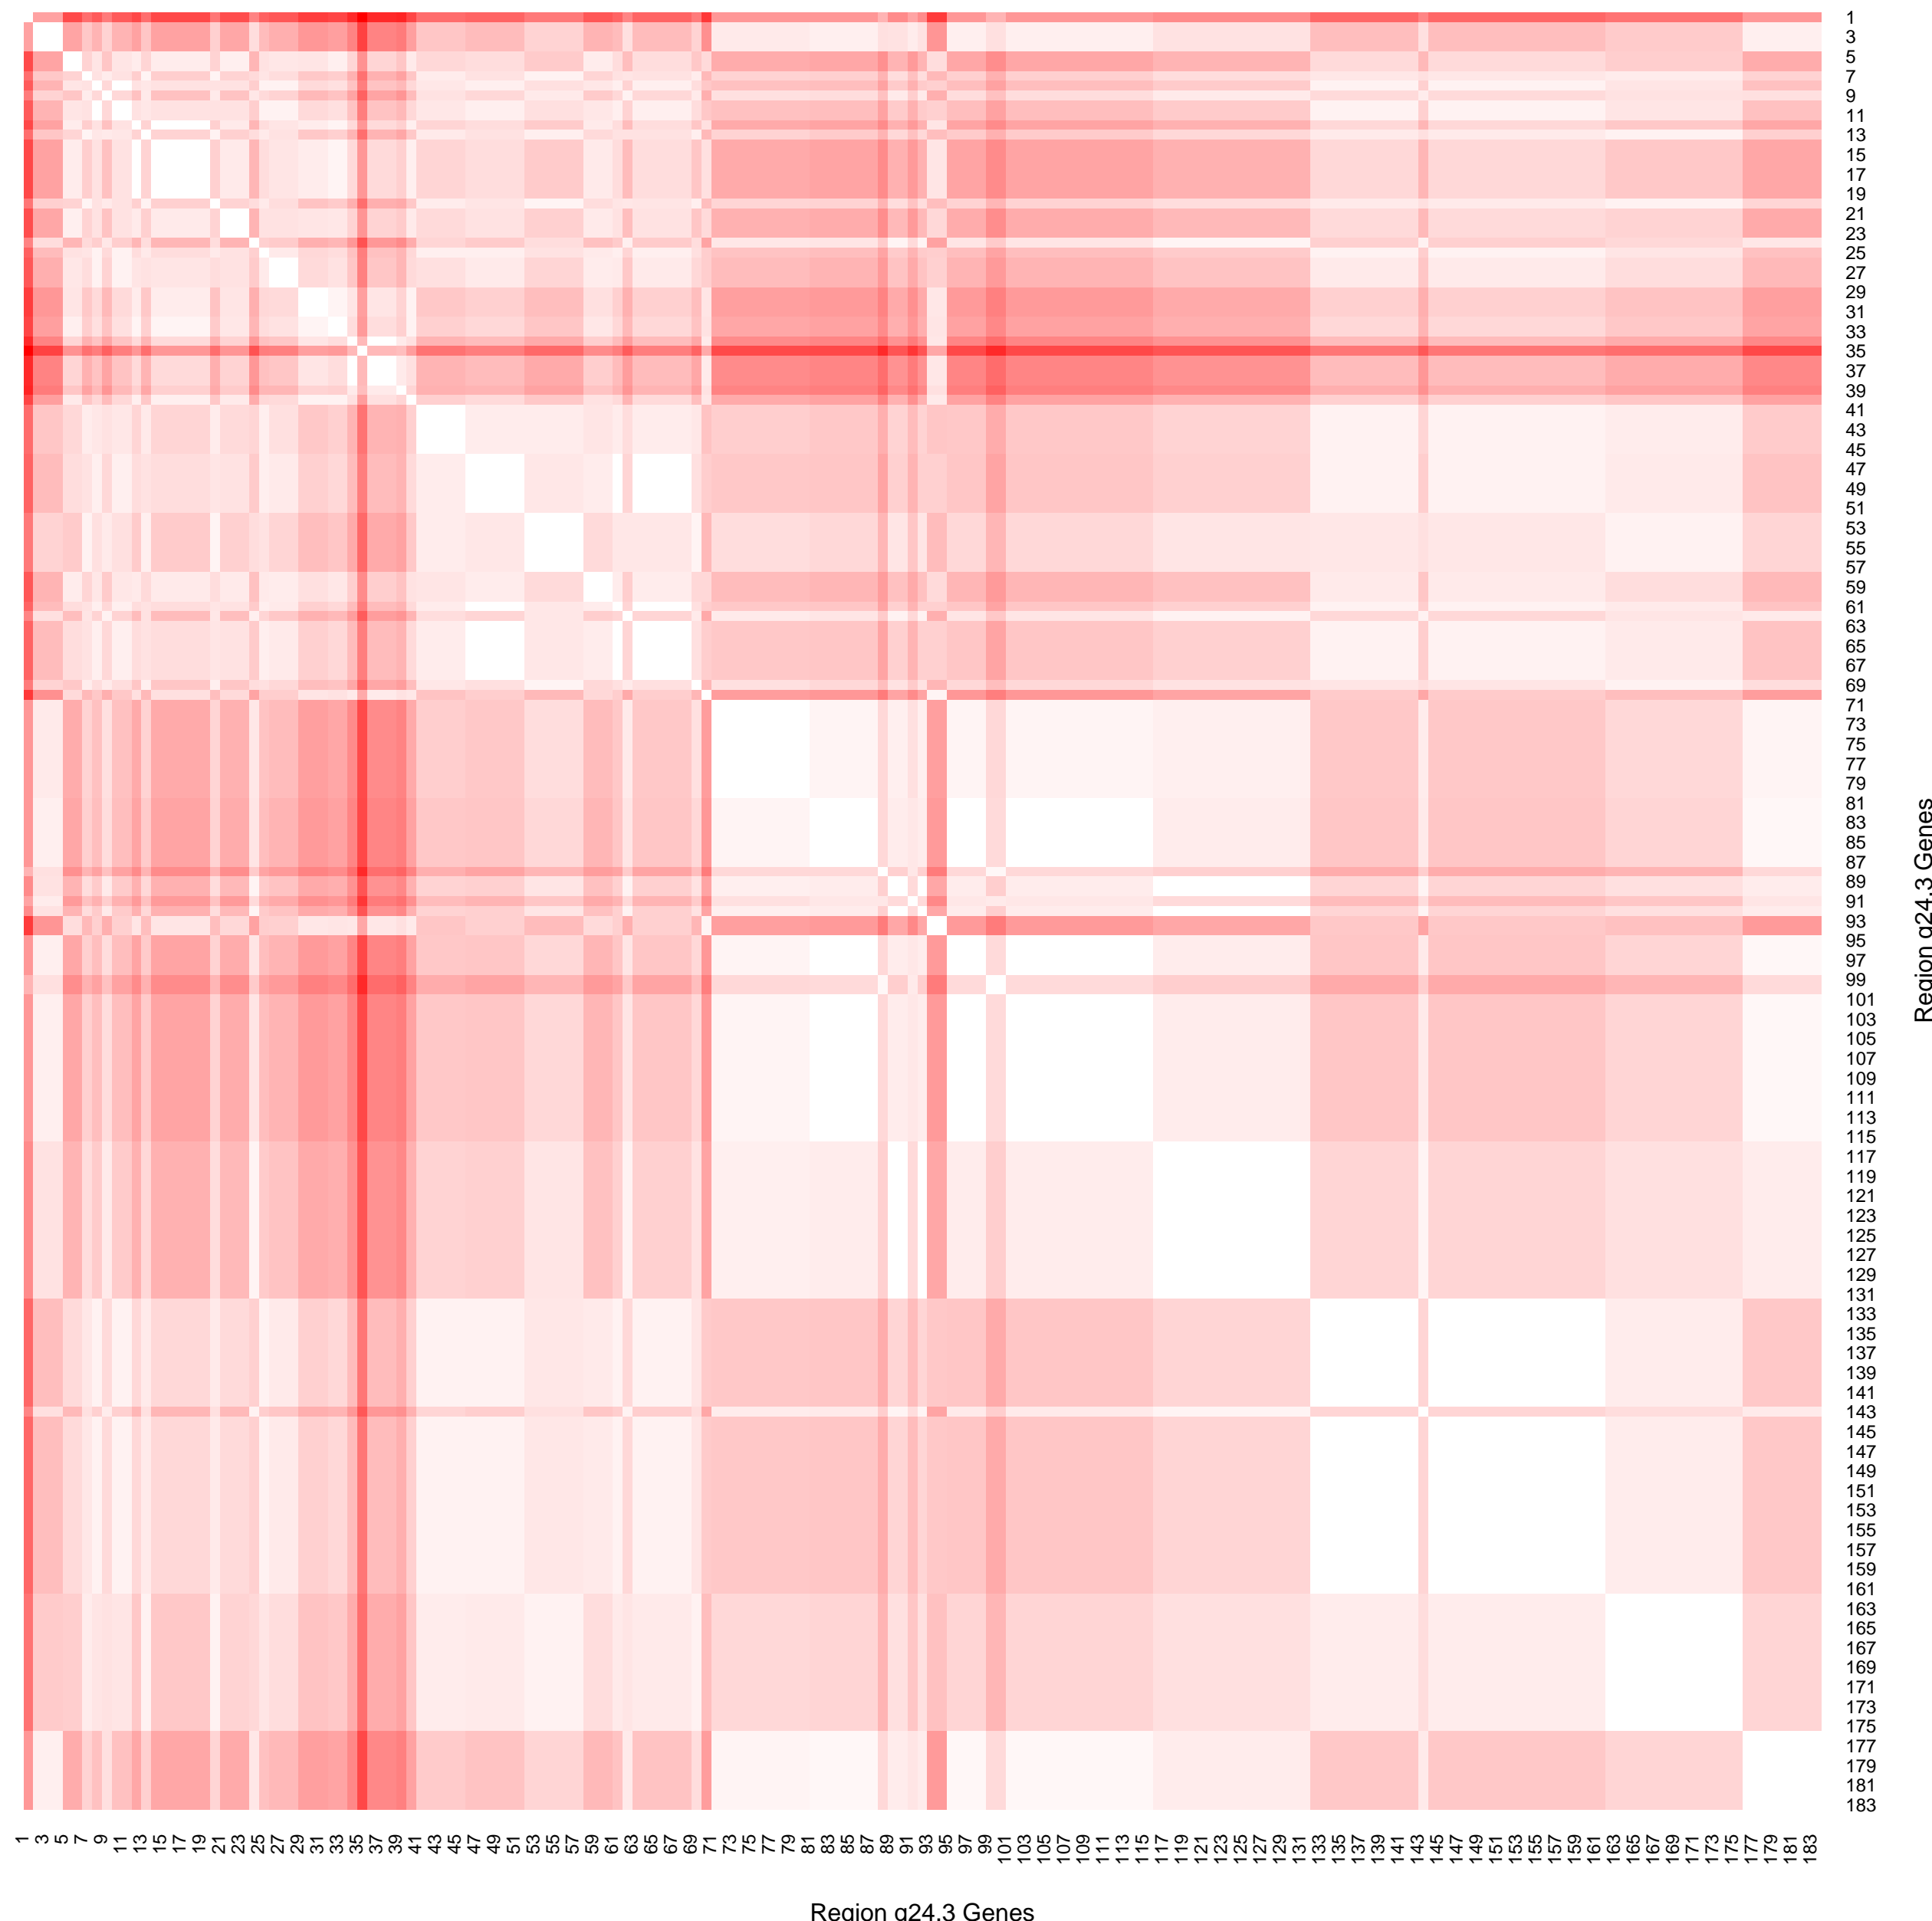

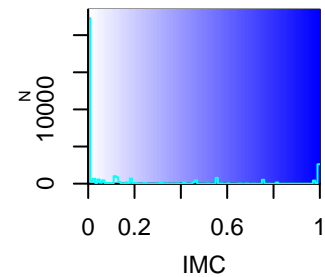

Heatmap Kolmogorov–Smirnov, p-values

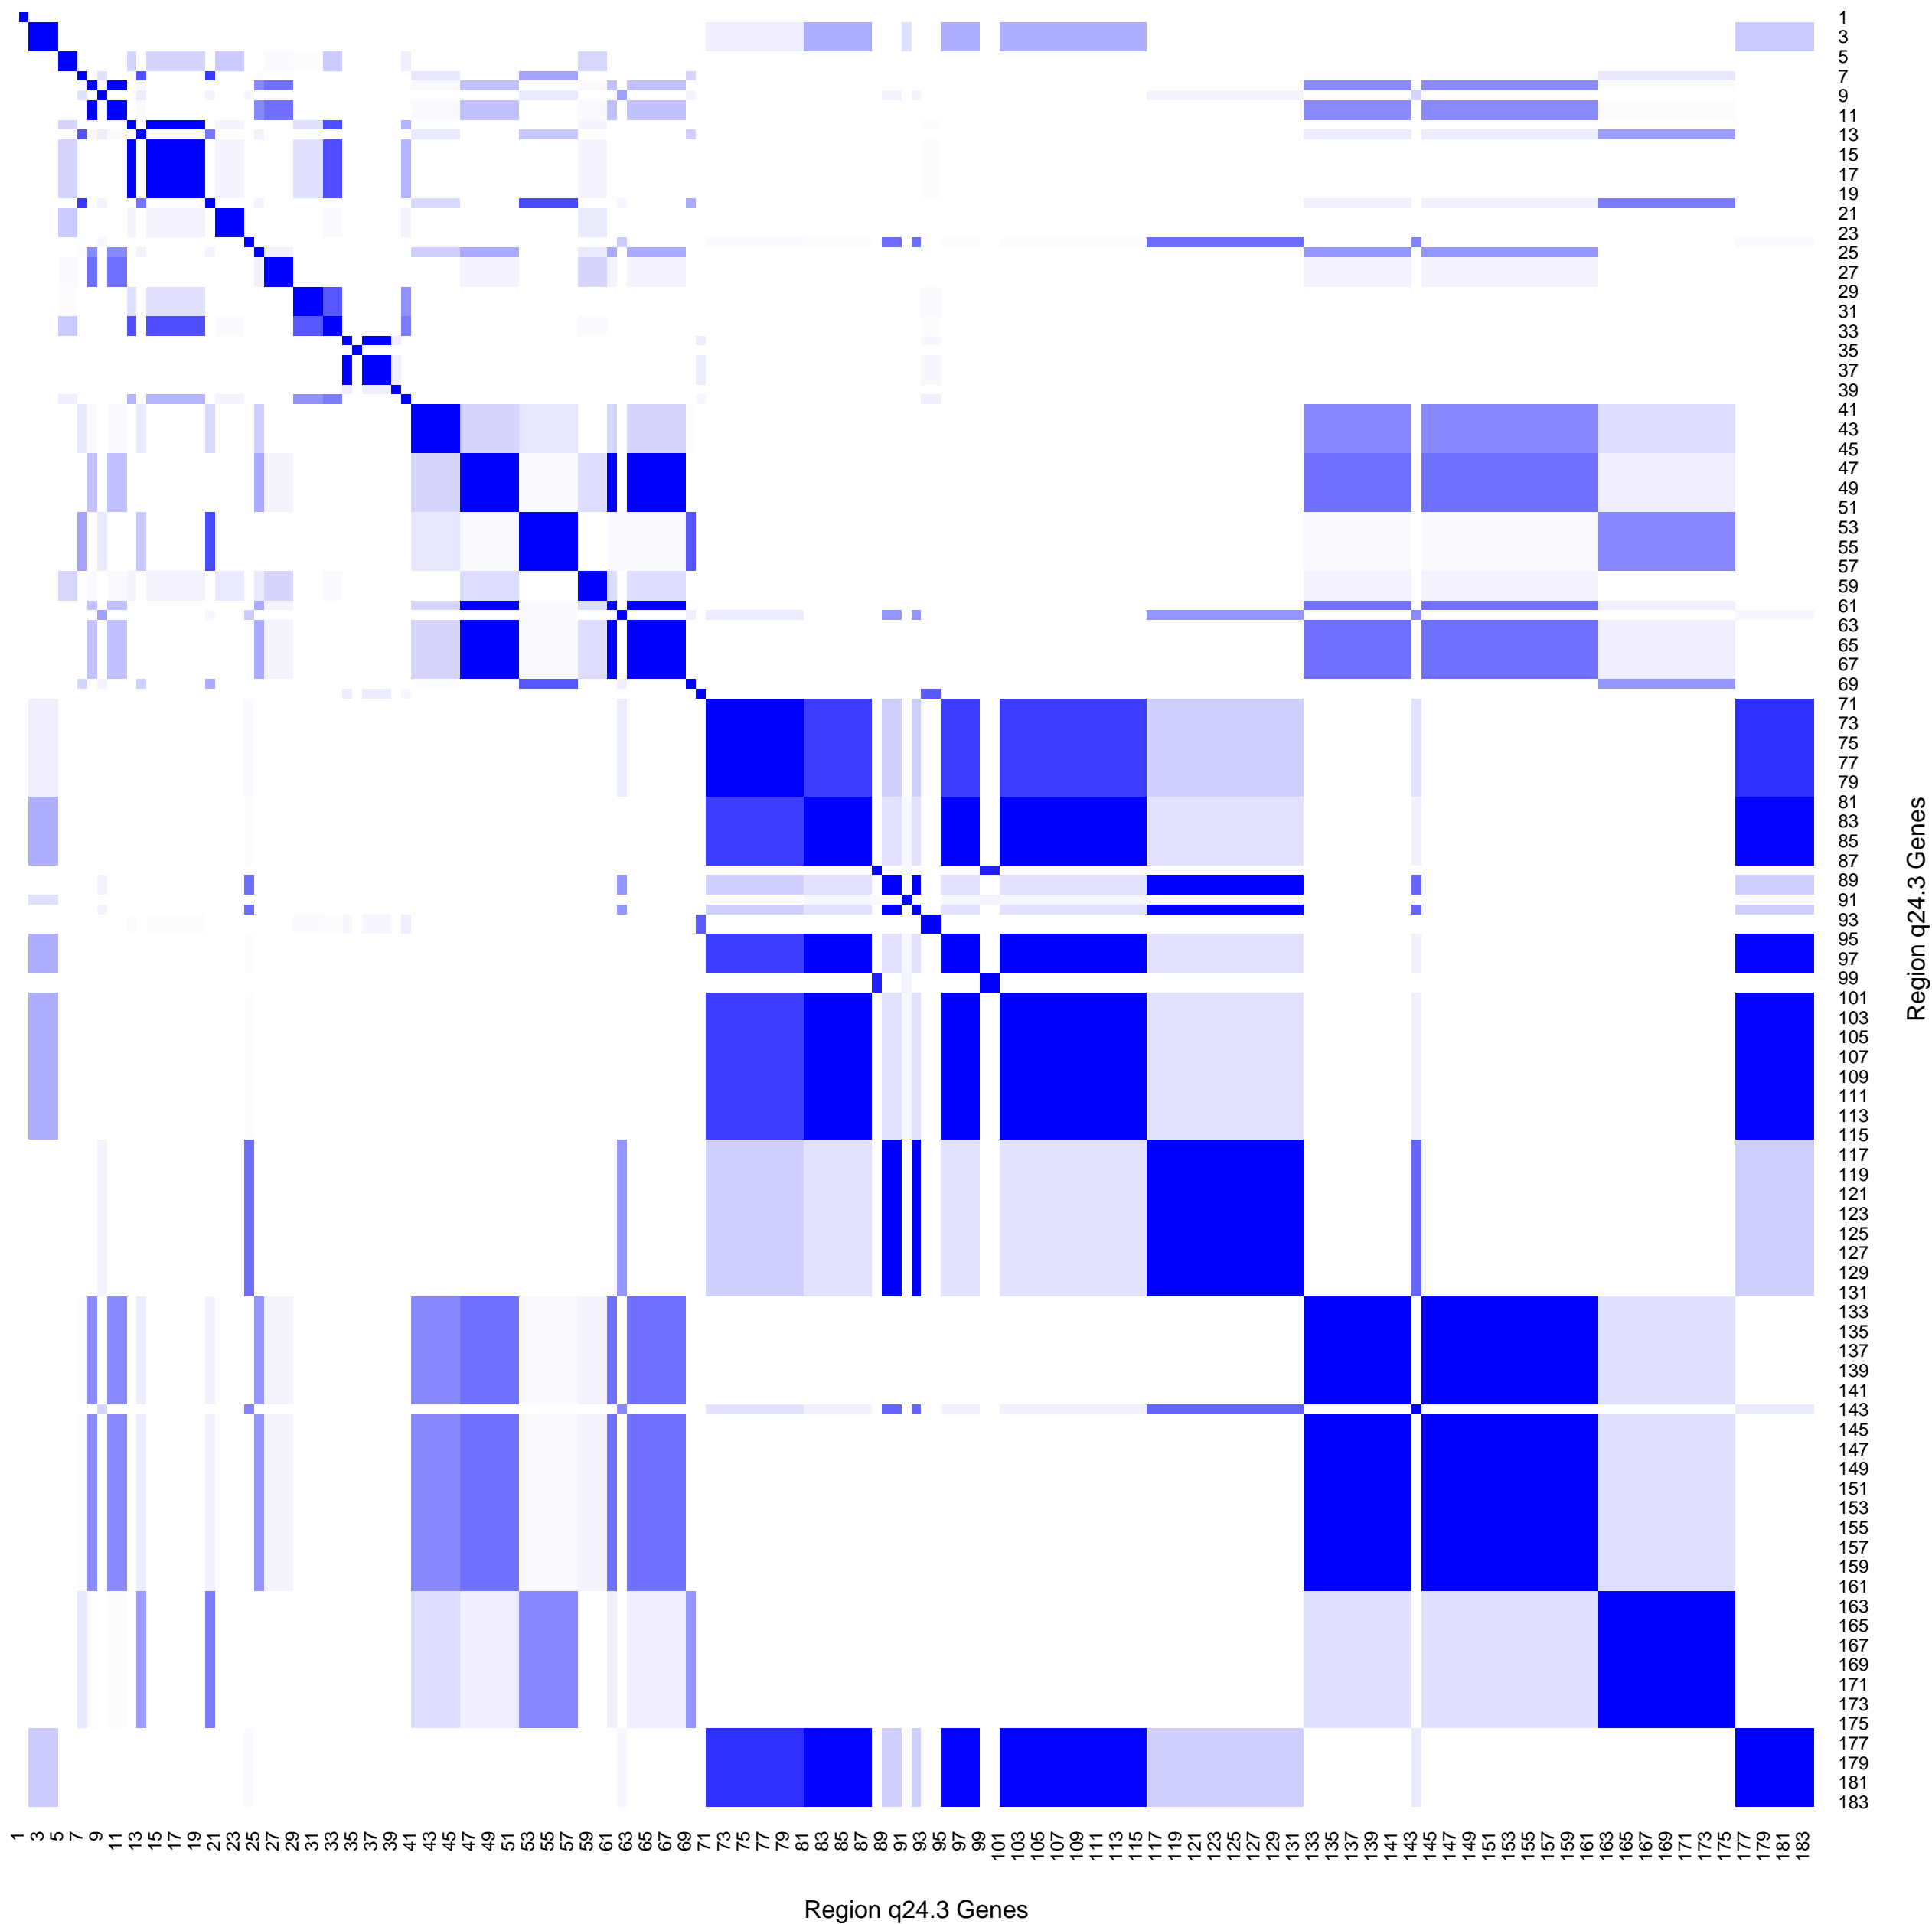

Supplement: Supplementary file 1 [file 34640546]
